## CORRECTION

# Correction: Statistical modeling and evaluation of the impact of multiplicity classification thresholds on the COVID-19 pool testing accuracy

Omar De La Cruz Cabrera, Razan Alsehibani

An additional affiliation is missing for the second author. Razan Alsehibani is also affiliated with Department of Statistics and Operations Research, King Saud University, Riyadh, Kingdom of Saudi Arabia.

## Reference

1. Cabrera ODLC, Alsehibani R (2023) Statistical modeling and evaluation of the impact of multiplicity classification thresholds on the COVID-19 pool testing accuracy. PLOS ONE 18(7): e0283874. <https://doi.org/10.1371/journal.pone.0283874> PMID: [37494364](https://pubmed.ncbi.nlm.nih.gov/37494364/)

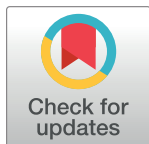

## OPEN ACCESS

**Citation:** Cabrera ODLC, Alsehibani R (2024)

Correction: Statistical modeling and evaluation of the impact of multiplicity classification thresholds on the COVID-19 pool testing accuracy. PLoS ONE 19(7): e0307053. <https://doi.org/10.1371/journal.pone.0307053>

**Published:** July 9, 2024

**Copyright:** © 2024 Cabrera, Alsehibani. This is an open access article distributed under the terms of the [Creative Commons Attribution License](https://creativecommons.org/licenses/by/4.0/), which permits unrestricted use, distribution, and reproduction in any medium, provided the original author and source are credited.
